# Supplementary material for: Iota-Carrageenan Inhibits Replication of SARS-CoV-2 and the Respective Variants of Concern Alpha, Beta, Gamma and Delta
Source: MDPI journal article supplement (doi:10.3390/ijms222413202), 2021-12-08
Supplement: s1 [file s1]

**Table S1:** Absolute values of RNA copies obtained by qRT-PCR for figure 2. Data represent means of 6 (A549-ACE2/TMPRSS2), 4 (Calu-3 - PR-1) or 3 (rest of data sets) independent experiments.

| <b><u>A549-ACE2/TMPRSS2</u></b>        |                                    |              |             |              |              |
|----------------------------------------|------------------------------------|--------------|-------------|--------------|--------------|
|                                        | <b>PR-1</b>                        | <b>Alpha</b> | <b>Beta</b> | <b>Gamma</b> | <b>Delta</b> |
|                                        | viral RNA copies [ $\times 10^3$ ] |              |             |              |              |
| <b>untreated</b>                       | 109                                | 795          | 184         | 326          | 33           |
| <b>5 <math>\mu\text{g/mL}</math></b>   | 73                                 | 369          | 125         | 168          | 17           |
| <b>10 <math>\mu\text{g/mL}</math></b>  | 58                                 | 359          | 73          | 122          | 14           |
| <b>15 <math>\mu\text{g/mL}</math></b>  | 46                                 | 244          | 77          | 95           | 8            |
| <b>20 <math>\mu\text{g/mL}</math></b>  | 42                                 | 176          | 68          | 47           | 6            |
| <b>100 <math>\mu\text{g/mL}</math></b> | 13                                 | 54           | 20          | 5            | 2            |
| <b><u>Calu-3</u></b>                   |                                    |              |             |              |              |
|                                        | <b>PR-1</b>                        | <b>Alpha</b> | <b>Beta</b> | <b>Gamma</b> | <b>Delta</b> |
|                                        | viral RNA copies [ $\times 10^3$ ] |              |             |              |              |
| <b>untreated</b>                       | 5453                               | 2932         | 1984        | 1537         | 112          |
| <b>0.1 <math>\mu\text{g/mL}</math></b> | 4811                               | 1655         | 1137        | 1032         | 57           |
| <b>1 <math>\mu\text{g/mL}</math></b>   | 1694                               | 175          | 453         | 354          | 27           |
| <b>10 <math>\mu\text{g/mL}</math></b>  | 898                                | 81           | 297         | 84           | 13           |
| <b>100 <math>\mu\text{g/mL}</math></b> | 23                                 | 35           | 188         | 7            | 4            |

**Table S2:** Absolute values of RNA copies obtained by qRT-PCR for figure 3. Data represent means of 4 (Beta and Gamma) and 3 (PR-1 and Alpha) independent experiments.

|                           |                      | <b>PR-1</b>                        | <b>Alpha</b> | <b>Beta</b> | <b>Gamma</b> |
|---------------------------|----------------------|------------------------------------|--------------|-------------|--------------|
|                           |                      | viral RNA copies [ $\times 10^3$ ] |              |             |              |
|                           | untreated            | 2802                               | 5100         | 635         | 4724         |
| <b>kappa-carrageenan</b>  | 10 $\mu\text{g/mL}$  | 1938                               | 4483         | 320         | 3600         |
|                           | 100 $\mu\text{g/mL}$ | 941                                | 1999         | 122         | 1518         |
| <b>lambda-carrageenan</b> | 10 $\mu\text{g/mL}$  | 2044                               | 4435         | 380         | 3312         |
|                           | 100 $\mu\text{g/mL}$ | 964                                | 1535         | 124         | 1801         |
